# Supplementary material
Source: Springer Nature journal article supplement (https://www.springermedizin.de/resource/supplementary/12984_2010_318_MOESM6_ESM.pdf/9605762)

Week 1

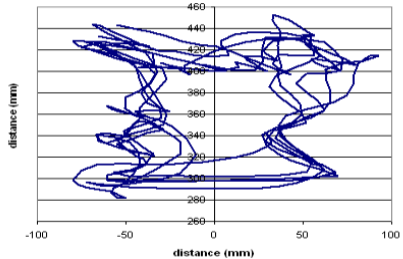

Week 5

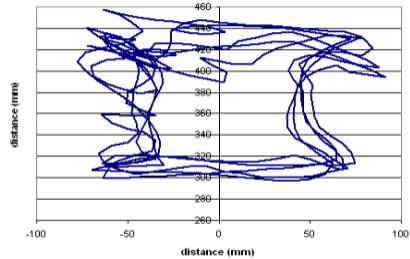

Week 10

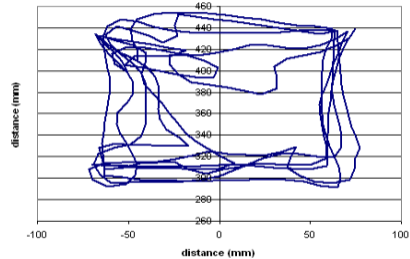

Supplement: MOESM6 [file 9605762]
